# Supplementary material for: Impact of Different Drying Methods on the Microbiota, Volatilome, Color, and Sensory Traits of Sea Fennel (Crithmum maritimum L.) Leaves
Source: MDPI journal article supplement (doi:10.3390/molecules28207207), 2023-10-21
Supplement: s1 [file s1]

**Table S1.** Bacterial amplicon sequencing variants (ASVs) detected (●) in the samples of dried sea fennel spices. For an explanation of the drying methods and batches used, see Table 1.

| Sample | Batch | <i>Bacillus</i> | <i>Brachybacterium</i> | Caulobacteraceae | <i>Devosia</i> | <i>Erwinia</i> | Gaiellaceae | Methylobacteriaceae | Microbacteriaceae | <i>Propionibacterium</i> | <i>Pseudomonas</i> | Rhodobacteraceae | <i>Sphingomonas</i> |
|--------|-------|-----------------|------------------------|------------------|----------------|----------------|-------------|---------------------|-------------------|--------------------------|--------------------|------------------|---------------------|
| OD     | 1     |                 |                        |                  |                |                |             |                     |                   | ●                        |                    |                  |                     |
|        | 2     |                 |                        | ●                |                | ●              | ●           | ●                   | ●                 |                          | ●                  | ●                |                     |
| MD     | 1     | ●               |                        |                  |                |                |             | ●                   |                   |                          |                    |                  | ●                   |
|        | 2     |                 |                        |                  |                |                |             | ●                   |                   |                          |                    |                  | ●                   |
| FD     | 1     |                 | ●                      | ●                | ●              |                |             |                     |                   |                          |                    |                  |                     |
|        | 2     |                 |                        |                  |                |                |             |                     |                   |                          |                    |                  | ●                   |

**Table S2.** Fungal amplicon sequencing variants (ASVs) detected (●) in the dried sea fennel samples. For an explanation of the drying methods and batches used, see Table 1.

| Drying treatment | Batch | <i>Alternaria</i> | <i>Aureobasidium</i> | <i>Bensingtonia</i> | <i>Cladosporium</i> | <i>Cryptococcus</i> | <i>Cystobasidium</i> | <i>Debaryomyces</i> | <i>Filobasidium</i> | <i>Kondoa</i> | <i>Penicillium</i> | <i>Protomyces</i> | <i>Rhodotorula</i> | <i>Sporobolomyces</i> | <i>Symmetrospora</i> | <i>Taphrina</i> | <i>Thelebolus</i> | <i>Tilletiopsis</i> | <i>Vishniacozyma</i> |
|------------------|-------|-------------------|----------------------|---------------------|---------------------|---------------------|----------------------|---------------------|---------------------|---------------|--------------------|-------------------|--------------------|-----------------------|----------------------|-----------------|-------------------|---------------------|----------------------|
| RTD              | 1     | ●                 | ●                    | ●                   | ●                   | ●                   | ●                    |                     | ●                   | ●             |                    | ●                 | ●                  | ●                     | ●                    | ●               | ●                 |                     | ●                    |
|                  | 2     | ●                 |                      | ●                   | ●                   | ●                   | ●                    |                     | ●                   | ●             | ●                  |                   |                    | ●                     | ●                    |                 | ●                 | ●                   | ●                    |
| OD               | 1     | ●                 | ●                    | ●                   | ●                   | ●                   | ●                    |                     | ●                   | ●             |                    | ●                 | ●                  | ●                     | ●                    | ●               | ●                 |                     | ●                    |
|                  | 2     | ●                 | ●                    | ●                   | ●                   |                     | ●                    |                     | ●                   | ●             |                    | ●                 | ●                  | ●                     | ●                    | ●               | ●                 |                     | ●                    |
| MD               | 1     | ●                 | ●                    | ●                   | ●                   | ●                   | ●                    |                     | ●                   | ●             |                    | ●                 | ●                  | ●                     | ●                    | ●               | ●                 | ●                   | ●                    |
|                  | 2     | ●                 | ●                    | ●                   | ●                   | ●                   | ●                    |                     | ●                   | ●             |                    | ●                 | ●                  | ●                     | ●                    | ●               | ●                 | ●                   | ●                    |
| FD               | 1     |                   | ●                    | ●                   | ●                   | ●                   | ●                    |                     | ●                   | ●             |                    | ●                 | ●                  | ●                     | ●                    |                 | ●                 |                     | ●                    |
|                  | 2     |                   |                      | ●                   | ●                   |                     |                      | ●                   |                     |               |                    | ●                 |                    | ●                     | ●                    |                 |                   |                     | ●                    |
